# Supplementary material
Source: publisher site journal article supplement (https://www.spandidos-publications.com/597/downloadSupplementary)
Supplement: Supplementary file 1 [file downloadSupplementary]

## Sheet: Early stage
Table SIV-A. KEGG for DEGs in early stage of irradiation (P<0.05).
Category	Term		-log(pvalue)	PValue	Genes	List Total	Pop Hits	Pop Total	Fold Enrichment	Bonferroni	Benjamini	FDR
KEGG_PATHWAY	hsa00970	Aminoacyl-tRNA biosynthesis	2.33246	0.00465097	FARSB, EPRS, MARS2, LARS2, FARSA, VARS, TARSL2	199	41	5085	4.36267	0.491334	0.491334	5.38396
KEGG_PATHWAY	hsa03050	Proteasome	2.03821	0.00915783	PSMB7, PSMB6, PSMC4, PSMB3, PSMB2, POMP, PSMD6	199	47	5085	3.80573	0.736579	0.486755	10.3466
KEGG_PATHWAY	hsa04310	Wnt signaling pathway	1.85089	0.0140966	TBL1XR1, NKD1, VANGL1, ROCK2, PPP2R5A, CREBBP, WNT7B, EP300, CCND3, RAC3, PPP2R5E, PPP3CA, MYC	199	151	5085	2.19991	0.872361	0.496506	15.5102
KEGG_PATHWAY	hsa04510	Focal adhesion	1.61803	0.0240974	CAV2, CAV1, ARHGAP5, PAK2, CCND3, RAC3, ITGB8, RASGRF1, ROCK2, TNC, SOS1, PDGFRB, RAP1B, ITGA4, MYLK	199	201	5085	1.90692	0.970897	0.586968	25.1421
KEGG_PATHWAY	hsa00230	Purine metabolism	1.45153	0.0353568	ITPA, ADCY1, NME2, POLR1E, PNPT1, POLR1A, POLA1, PDE4D, POLR1B, PAICS, PAPSS2, APRT	199	153	5085	2.00414	0.99459	0.647925	34.7759

## Sheet: Intermediate stage
Table SIV-B. KEGG for DEGs in intermediate stage of irradiation (P<0.05).
Category	Term		-log(pvalue)	PValue	Genes	List Total	Pop Hits	Pop Total	Fold Enrichment	Bonferroni	Benjamini	FDR
KEGG_PATHWAY	hsa04512	ECM-receptor interaction	6.39434	4.03325e-07	LAMA1, LAMA4, LAMB3, LAMA3, CD44, ITGB6, DAG1, COL6A1, LAMC2, ITGA3, LAMB1, SDC4	98	84	5085	7.41254	4.0735e-05	4.0735e-05	0.000448502
KEGG_PATHWAY	hsa05222	Small cell lung cancer	4.58504	2.59992e-05	FHIT, LAMA1, LAMA4, LAMB3, LAMA3, LAMC2, ITGA3, IKBKB, LAMB1, BIRC3	98	84	5085	6.17711	0.00262251	0.00131211	0.0289077
KEGG_PATHWAY	hsa05410	Hypertrophic cardiomyopathy (HCM)	3.72454	0.000188563	ACE, IL6, CACNG6, ITGB6, DAG1, ITGA3, TPM2, TPM4, TGFB2	98	85	5085	5.494	0.0188664	0.00632877	0.209485
KEGG_PATHWAY	hsa04640	Hematopoietic cell lineage	3.68894	0.000204675	CD9, IL1R2, CD55, IL6, CD44, IL4R, ITGA3, IL7R, IL11	98	86	5085	5.43011	0.020462	0.00515524	0.227366
KEGG_PATHWAY	hsa04510	Focal adhesion	2.85094	0.00140947	LAMA1, LAMA4, LAMB3, LAMA3, ITGB6, MYLPF, COL6A1, LAMC2, ITGA3, LAMB1, BIRC3, FLNB	98	201	5085	3.09778	0.132775	0.0280894	1.55622
KEGG_PATHWAY	hsa05414	Dilated cardiomyopathy	2.10453	0.00786078	CACNG6, ITGB6, DAG1, ITGA3, TPM2, TPM4, TGFB2	98	92	5085	3.94798	0.549355	0.1244	8.40178
KEGG_PATHWAY	hsa04060	Cytokine-cytokine receptor interaction	1.97388	0.0106199	LIF, TNFRSF10A, TNFRSF9, INHBA, IL1R2, IL6, TNFRSF10D, IL4R, CXCL2, IL7R, IL11, TGFB2	98	262	5085	2.37654	0.659843	0.14277	11.1949
KEGG_PATHWAY	hsa04621	NOD-like receptor signaling pathway	1.52444	0.029892	IL6, CXCL2, TNFAIP3, IKBKB, BIRC3	98	62	5085	4.1845	0.953352	0.318284	28.6429
KEGG_PATHWAY	hsa05200	Pathways in cancer	1.33239	0.0465163	LAMA1, LAMA4, LAMB3, IL6, LAMA3, RASSF1, LAMC2, ITGA3, IKBKB, LAMB1, BIRC3, TGFB2	98	328	5085	1.89833	0.99186	0.414066	41.121

## Sheet: Later stage
Table SIV-C. KEGG for DEGs in later stage of irradiation.
Category	Term		-log(pvalue)	PValue	Genes	List Total	Pop Hits	Pop Total	Fold Enrichment	Bonferroni	Benjamini	FDR
KEGG_PATHWAY	hsa04142	Lysosome	1.86151	0.013756	HYAL1, CLN3, NPC1, SLC17A5, LAPTM4A, CD63, GGA1	87	117	5085	3.49691	0.687618	0.687618	13.8155
KEGG_PATHWAY	hsa04610	Complement and coagulation cascades	1.54244	0.0286786	PLAT, A2M, C3, SERPINE1, PLAUR	87	69	5085	4.23538	0.913206	0.705392	26.8261
KEGG_PATHWAY	hsa04150	mTOR signaling pathway	1.24377	0.0570462	CAB39L, ULK1, VEGFA, DDIT4	87	52	5085	4.49602	0.992802	0.806922	46.7666
